# Supplementary material
Source: ML conference proceedings conference paper supplement (https://openaccess.thecvf.com/content/CVPR2022/html/Kim_Layered_Depth_Refinement_CVPR_2022_paper.html)
Supplement: Supplementary file 2 [file Kim_Layered_Depth_Refinement_CVPR_2022_supplemental.zip]

Archive with 130 entries (123 files):
- 08082-supp.pdf
- comparisons.html
- comparisons/
- comparisons/boosting/
- comparisons/boosting/.ipynb_checkpoints/
- comparisons/boosting/.ipynb_checkpoints/AdobeStock_63181133_mid-checkpoint.png
- comparisons/boosting/AdobeStock_63181133.png
- comparisons/boosting/AdobeStock_83226935.png
- comparisons/boosting/alexis-reyna-tZGZiV0Xppc-unsplash.png
- comparisons/boosting/allen-taylor-0cmJRW5rOJ8-unsplash.png
- comparisons/boosting/austin-wade-X6Uj51n5CE8-unsplash.png
- comparisons/boosting/ayo-ogunseinde-RrD8ypt8cjY-unsplash.png
- comparisons/boosting/christian-buehner-DItYlc26zVI-unsplash.png
- comparisons/boosting/clarke-sanders-ybPJ47PMT_M-unsplash.png
- comparisons/boosting/duy-pham-Cecb0_8Hx-o-unsplash.png
- comparisons/boosting/ethan-johnson-IzUyV6BbfQw-unsplash.png
- comparisons/boosting/eye-for-ebony-vYpbBtkDhNE-unsplash.png
- comparisons/boosting/family-g27080145e_1920-pixabay.png
- comparisons/boosting/irina-murza-vENEN2cryYQ-unsplash.png
- comparisons/boosting/jackie-parker-SnyQ8h22dl8-unsplash.png
- comparisons/boosting/MeredithSkyReplace-0891.png
- comparisons/boosting/MoreSky02.png
- comparisons/boosting/natasha-ivanchikhina-eU3e-hO0jkU-unsplash.png
- comparisons/boosting/nikola-saliba-BonFa3wUrnU-unsplash.png
- comparisons/boosting/richard-brutyo-xvYxGcwFvuE-unsplash.png
- comparisons/boosting/terricks-noah-OyhmfCc0pw4-unsplash.png
- comparisons/boosting/thought-catalog-mPE2I7afQiw-unsplash.png
- comparisons/boosting/tyler-nix-V3dHmb1MOXM-unsplash.png
- comparisons/boosting/woman-g1a2e19219_1920-pixabay.png
- comparisons/boosting/zachary-nelson-98Elr-LIvD8-unsplash.png
- comparisons/dpt/
- comparisons/dpt/AdobeStock_63181133_depth.png
- comparisons/dpt/AdobeStock_83226935_depth.png
- comparisons/dpt/alexis-reyna-tZGZiV0Xppc-unsplash_depth.png
- comparisons/dpt/allen-taylor-0cmJRW5rOJ8-unsplash_depth.png
- comparisons/dpt/austin-wade-X6Uj51n5CE8-unsplash_depth.png
- comparisons/dpt/ayo-ogunseinde-RrD8ypt8cjY-unsplash_depth.png
- comparisons/dpt/christian-buehner-DItYlc26zVI-unsplash_depth.png
- comparisons/dpt/clarke-sanders-ybPJ47PMT_M-unsplash_depth.png
- comparisons/dpt/duy-pham-Cecb0_8Hx-o-unsplash_depth.png
- comparisons/dpt/ethan-johnson-IzUyV6BbfQw-unsplash_depth.png
- comparisons/dpt/eye-for-ebony-vYpbBtkDhNE-unsplash_depth.png
- comparisons/dpt/family-g27080145e_1920-pixabay_depth.png
- comparisons/dpt/irina-murza-vENEN2cryYQ-unsplash_depth.png
- comparisons/dpt/jackie-parker-SnyQ8h22dl8-unsplash_depth.png
- comparisons/dpt/MeredithSkyReplace-0891_depth.png
- comparisons/dpt/MoreSky02_depth.png
- comparisons/dpt/natasha-ivanchikhina-eU3e-hO0jkU-unsplash_depth.png
- comparisons/dpt/nikola-saliba-BonFa3wUrnU-unsplash_depth.png
- comparisons/dpt/richard-brutyo-xvYxGcwFvuE-unsplash_depth.png
- comparisons/dpt/terricks-noah-OyhmfCc0pw4-unsplash_depth.png
- comparisons/dpt/thought-catalog-mPE2I7afQiw-unsplash_depth.png
- comparisons/dpt/tyler-nix-V3dHmb1MOXM-unsplash_depth.png
- comparisons/dpt/woman-g1a2e19219_1920-pixabay_depth.png
- comparisons/dpt/zachary-nelson-98Elr-LIvD8-unsplash_depth.png
- comparisons/mask/
- comparisons/mask/AdobeStock_63181133_mask.png
- comparisons/mask/AdobeStock_83226935_mask.png
- comparisons/mask/alexis-reyna-tZGZiV0Xppc-unsplash_mask.png
- comparisons/mask/allen-taylor-0cmJRW5rOJ8-unsplash_mask.png
- comparisons/mask/austin-wade-X6Uj51n5CE8-unsplash_mask.png
- comparisons/mask/ayo-ogunseinde-RrD8ypt8cjY-unsplash_mask.png
- comparisons/mask/christian-buehner-DItYlc26zVI-unsplash_mask.png
- comparisons/mask/clarke-sanders-ybPJ47PMT_M-unsplash_mask.png
- comparisons/mask/duy-pham-Cecb0_8Hx-o-unsplash_mask.png
- comparisons/mask/ethan-johnson-IzUyV6BbfQw-unsplash_mask.png
- comparisons/mask/eye-for-ebony-vYpbBtkDhNE-unsplash_mask.png
- comparisons/mask/family-g27080145e_1920-pixabay_mask.png
- comparisons/mask/irina-murza-vENEN2cryYQ-unsplash_mask.png
- comparisons/mask/jackie-parker-SnyQ8h22dl8-unsplash_mask.png
- comparisons/mask/MeredithSkyReplace-0891_mask.png
- comparisons/mask/MoreSky02_mask.png
- comparisons/mask/natasha-ivanchikhina-eU3e-hO0jkU-unsplash_mask.png
- comparisons/mask/nikola-saliba-BonFa3wUrnU-unsplash_mask.png
- comparisons/mask/richard-brutyo-xvYxGcwFvuE-unsplash_mask.png
- comparisons/mask/terricks-noah-OyhmfCc0pw4-unsplash_mask.png
- comparisons/mask/thought-catalog-mPE2I7afQiw-unsplash_mask.png
- comparisons/mask/tyler-nix-V3dHmb1MOXM-unsplash_mask.png
- comparisons/mask/woman-g1a2e19219_1920-pixabay_mask.png
- comparisons/mask/zachary-nelson-98Elr-LIvD8-unsplash_mask.png
- comparisons/ours/
- comparisons/ours/AdobeStock_63181133_pred.png
- comparisons/ours/AdobeStock_83226935_pred.png
- comparisons/ours/alexis-reyna-tZGZiV0Xppc-unsplash_pred.png
- comparisons/ours/allen-taylor-0cmJRW5rOJ8-unsplash_pred.png
- comparisons/ours/austin-wade-X6Uj51n5CE8-unsplash_pred.png
- comparisons/ours/ayo-ogunseinde-RrD8ypt8cjY-unsplash_pred.png
- comparisons/ours/christian-buehner-DItYlc26zVI-unsplash_pred.png
- comparisons/ours/clarke-sanders-ybPJ47PMT_M-unsplash_pred.png
- comparisons/ours/duy-pham-Cecb0_8Hx-o-unsplash_pred.png
- comparisons/ours/ethan-johnson-IzUyV6BbfQw-unsplash_pred.png
- comparisons/ours/eye-for-ebony-vYpbBtkDhNE-unsplash_pred.png
- comparisons/ours/family-g27080145e_1920-pixabay_pred.png
- comparisons/ours/irina-murza-vENEN2cryYQ-unsplash_pred.png
- comparisons/ours/jackie-parker-SnyQ8h22dl8-unsplash_pred.png
- comparisons/ours/MeredithSkyReplace-0891_pred.png
- comparisons/ours/MoreSky02_pred.png
- comparisons/ours/natasha-ivanchikhina-eU3e-hO0jkU-unsplash_pred.png
- comparisons/ours/nikola-saliba-BonFa3wUrnU-unsplash_pred.png
- comparisons/ours/richard-brutyo-xvYxGcwFvuE-unsplash_pred.png
- comparisons/ours/terricks-noah-OyhmfCc0pw4-unsplash_pred.png
- comparisons/ours/thought-catalog-mPE2I7afQiw-unsplash_pred.png
- comparisons/ours/tyler-nix-V3dHmb1MOXM-unsplash_pred.png
- comparisons/ours/woman-g1a2e19219_1920-pixabay_pred.png
- comparisons/ours/zachary-nelson-98Elr-LIvD8-unsplash_pred.png
- comparisons/rgb/
- comparisons/rgb/AdobeStock_63181133.jpg
- comparisons/rgb/AdobeStock_83226935.jpg
- comparisons/rgb/alexis-reyna-tZGZiV0Xppc-unsplash.jpg
- comparisons/rgb/allen-taylor-0cmJRW5rOJ8-unsplash.jpg
- comparisons/rgb/austin-wade-X6Uj51n5CE8-unsplash.jpg
- comparisons/rgb/ayo-ogunseinde-RrD8ypt8cjY-unsplash.jpg
- comparisons/rgb/christian-buehner-DItYlc26zVI-unsplash.jpg
- comparisons/rgb/clarke-sanders-ybPJ47PMT_M-unsplash.jpg
- comparisons/rgb/duy-pham-Cecb0_8Hx-o-unsplash.jpg
- comparisons/rgb/ethan-johnson-IzUyV6BbfQw-unsplash.jpg
- comparisons/rgb/eye-for-ebony-vYpbBtkDhNE-unsplash.jpg
- comparisons/rgb/family-g27080145e_1920-pixabay.jpg
- comparisons/rgb/irina-murza-vENEN2cryYQ-unsplash.jpg
- comparisons/rgb/jackie-parker-SnyQ8h22dl8-unsplash.jpg
- comparisons/rgb/MeredithSkyReplace-0891.jpg
- comparisons/rgb/MoreSky02.jpg
- comparisons/rgb/natasha-ivanchikhina-eU3e-hO0jkU-unsplash.jpg
- comparisons/rgb/nikola-saliba-BonFa3wUrnU-unsplash.jpg
- comparisons/rgb/richard-brutyo-xvYxGcwFvuE-unsplash.jpg
- comparisons/rgb/terricks-noah-OyhmfCc0pw4-unsplash.jpg
- comparisons/rgb/thought-catalog-mPE2I7afQiw-unsplash.jpg
- comparisons/rgb/tyler-nix-V3dHmb1MOXM-unsplash.jpg
- comparisons/rgb/woman-g1a2e19219_1920-pixabay.jpg
- comparisons/rgb/zachary-nelson-98Elr-LIvD8-unsplash.jpg
