# Supplementary material
Source: ML conference proceedings conference paper supplement (https://openaccess.thecvf.com/content/CVPR2022/html/Kim_Layered_Depth_Refinement_CVPR_2022_paper.html)
Supplement: Supplementary file 2 [file Kim_Layered_Depth_Refinement_CVPR_2022_supplemental.zip › comparisons.html]

Input  
image
DPT
Ours
Boosting
Mask  
(for ours)

All images are from unsplash, pixabay and Adobe Stock.
  
**DPT**: Ranftl et al., Vision Transformers for Dense Prediction, ICCV, 2021.
  
**Boosting**: Miangoleh et al., Boosting Monocular Depth Estimation Models to High-Resolution via Content-Adaptive Multi-Resolution Merging, CVPR, 2021.
