# Supplementary material (part 2 of 2)
Source: ML conference proceedings conference paper supplement (https://openaccess.thecvf.com/content/CVPR2022/html/Kim_Layered_Depth_Refinement_CVPR_2022_paper.html)

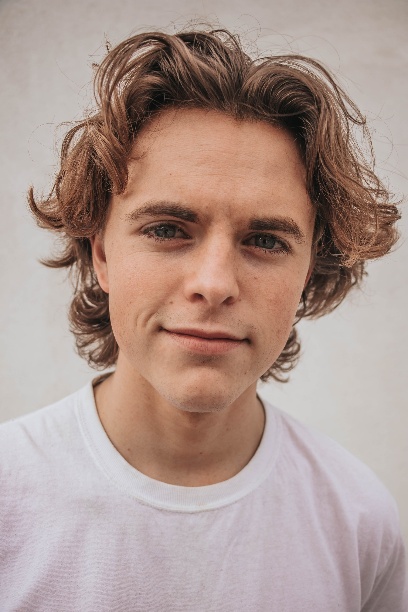

Supplement: Supplementary file 2 [file Kim_Layered_Depth_Refinement_CVPR_2022_supplemental.zip › comparisons/rgb/austin-wade-X6Uj51n5CE8-unsplash.jpg]

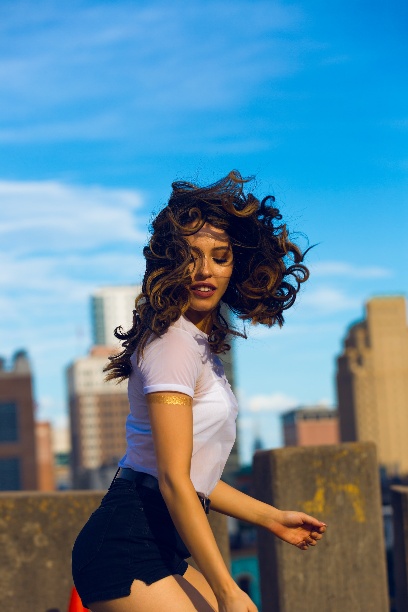

Supplement: Supplementary file 2 [file Kim_Layered_Depth_Refinement_CVPR_2022_supplemental.zip › comparisons/rgb/ayo-ogunseinde-RrD8ypt8cjY-unsplash.jpg]

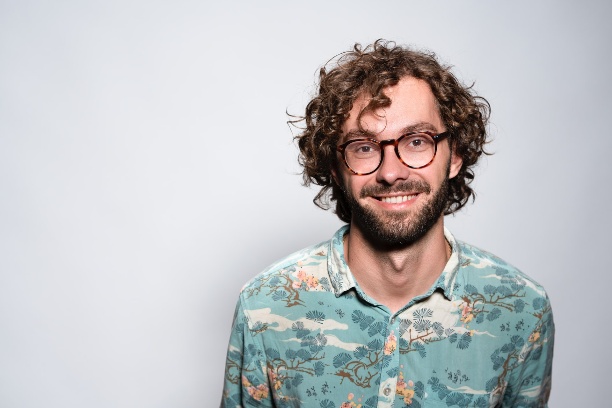

Supplement: Supplementary file 2 [file Kim_Layered_Depth_Refinement_CVPR_2022_supplemental.zip › comparisons/rgb/christian-buehner-DItYlc26zVI-unsplash.jpg]

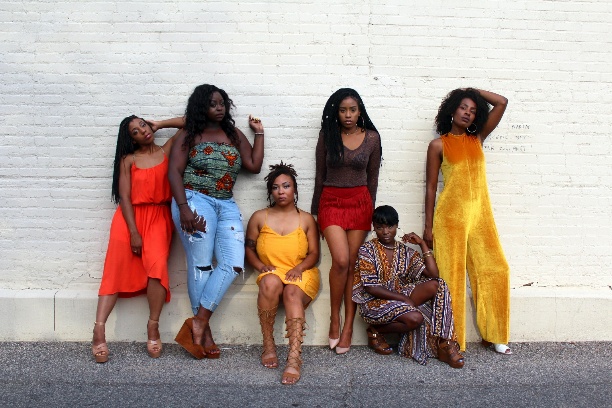

Supplement: Supplementary file 2 [file Kim_Layered_Depth_Refinement_CVPR_2022_supplemental.zip › comparisons/rgb/clarke-sanders-ybPJ47PMT_M-unsplash.jpg]

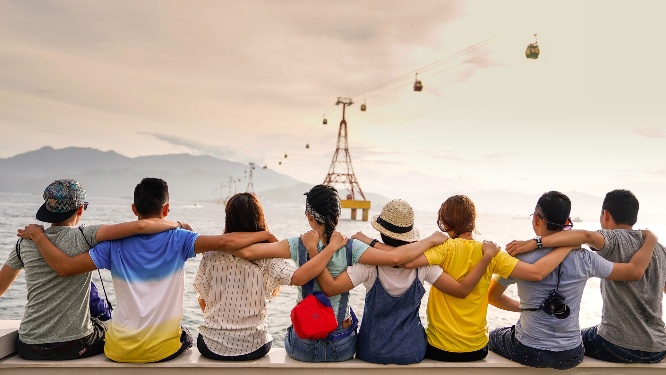

Supplement: Supplementary file 2 [file Kim_Layered_Depth_Refinement_CVPR_2022_supplemental.zip › comparisons/rgb/duy-pham-Cecb0_8Hx-o-unsplash.jpg]

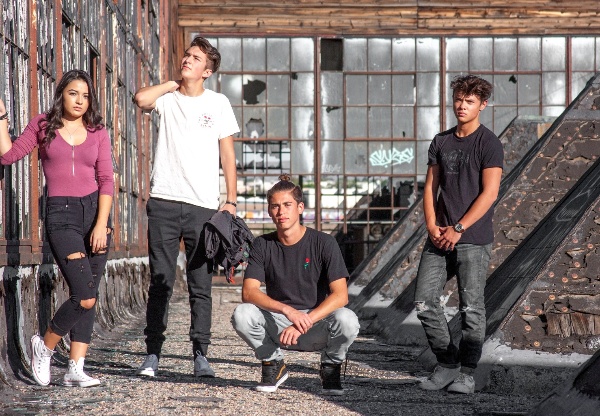

Supplement: Supplementary file 2 [file Kim_Layered_Depth_Refinement_CVPR_2022_supplemental.zip › comparisons/rgb/ethan-johnson-IzUyV6BbfQw-unsplash.jpg]

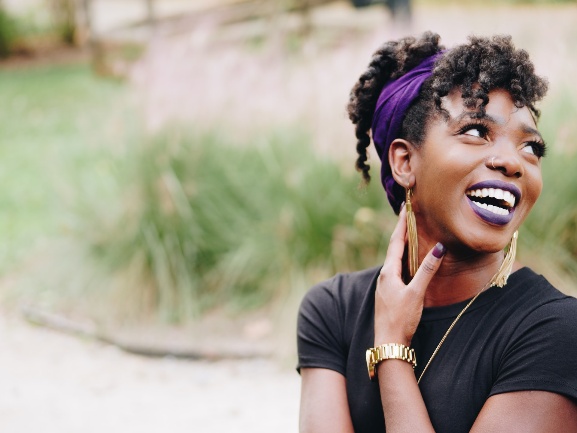

Supplement: Supplementary file 2 [file Kim_Layered_Depth_Refinement_CVPR_2022_supplemental.zip › comparisons/rgb/eye-for-ebony-vYpbBtkDhNE-unsplash.jpg]

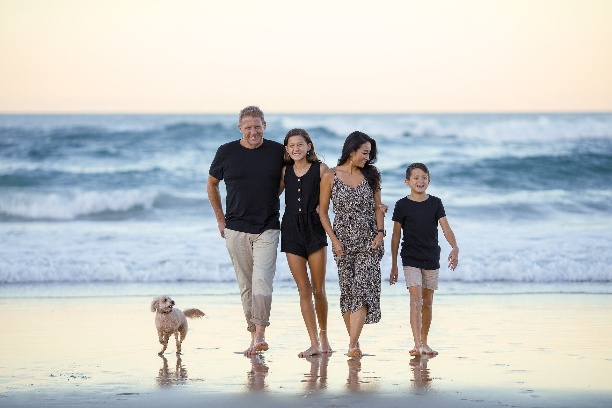

Supplement: Supplementary file 2 [file Kim_Layered_Depth_Refinement_CVPR_2022_supplemental.zip › comparisons/rgb/family-g27080145e_1920-pixabay.jpg]

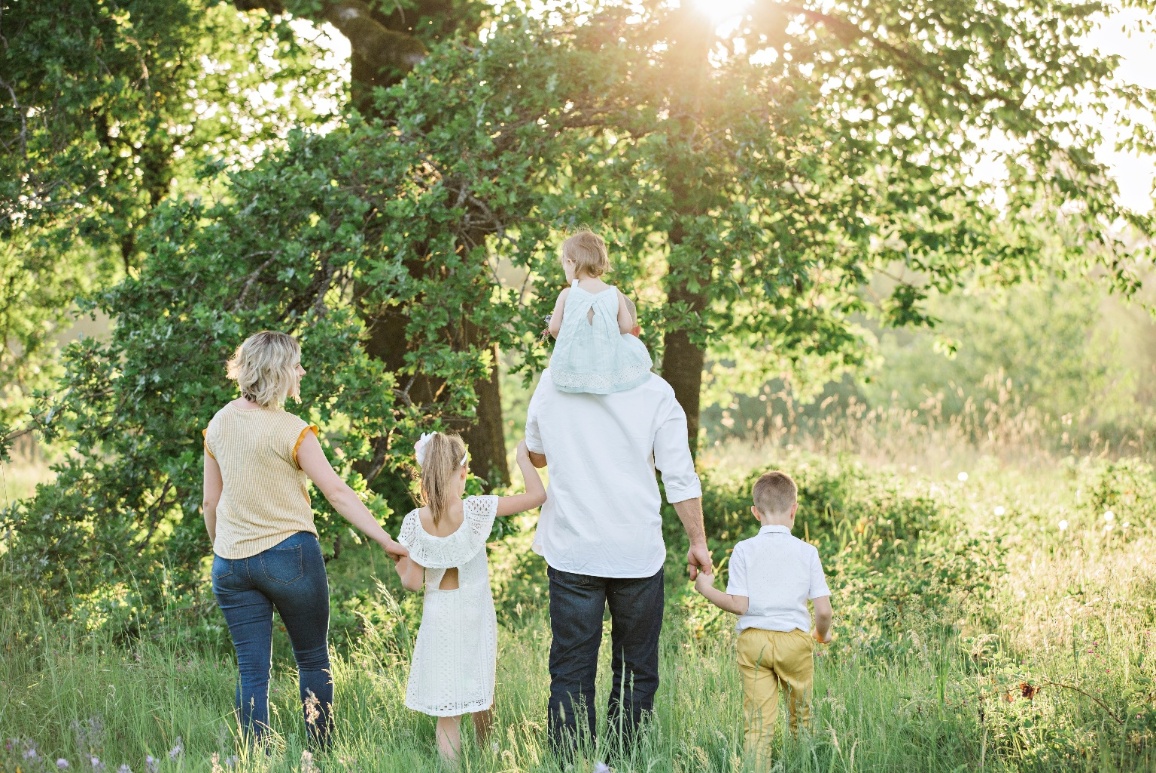

Supplement: Supplementary file 2 [file Kim_Layered_Depth_Refinement_CVPR_2022_supplemental.zip › comparisons/rgb/irina-murza-vENEN2cryYQ-unsplash.jpg]

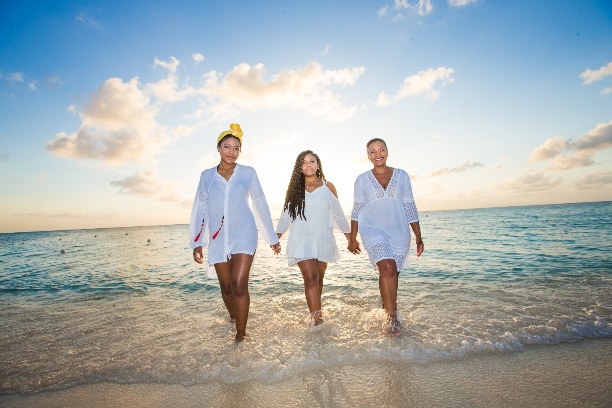

Supplement: Supplementary file 2 [file Kim_Layered_Depth_Refinement_CVPR_2022_supplemental.zip › comparisons/rgb/jackie-parker-SnyQ8h22dl8-unsplash.jpg]

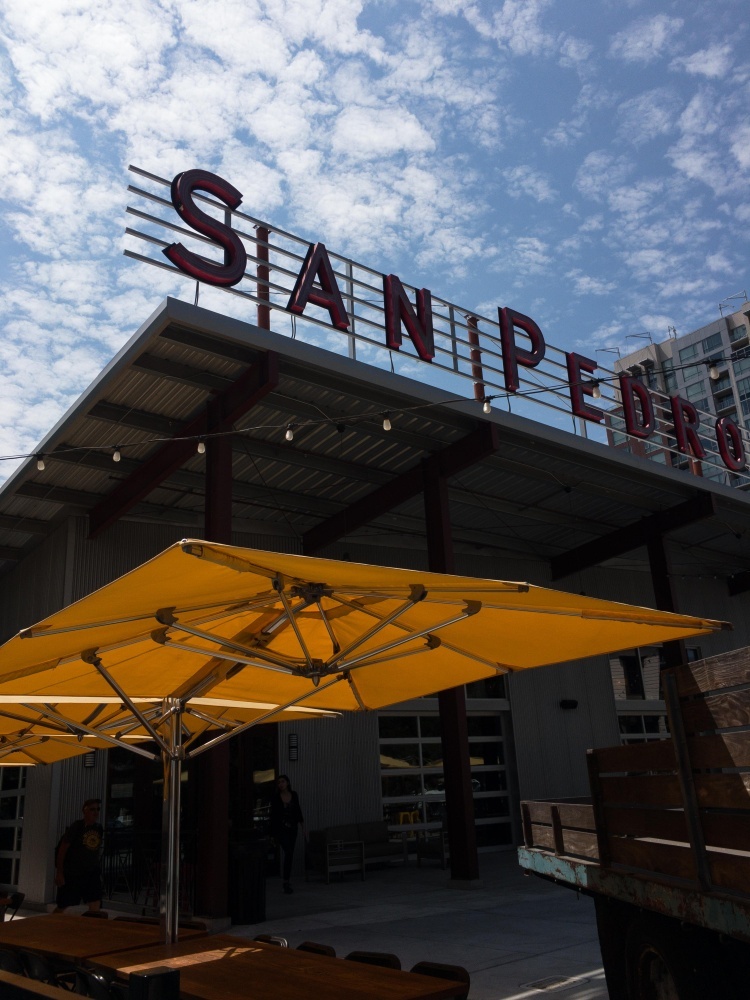

Supplement: Supplementary file 2 [file Kim_Layered_Depth_Refinement_CVPR_2022_supplemental.zip › comparisons/rgb/MeredithSkyReplace-0891.jpg]

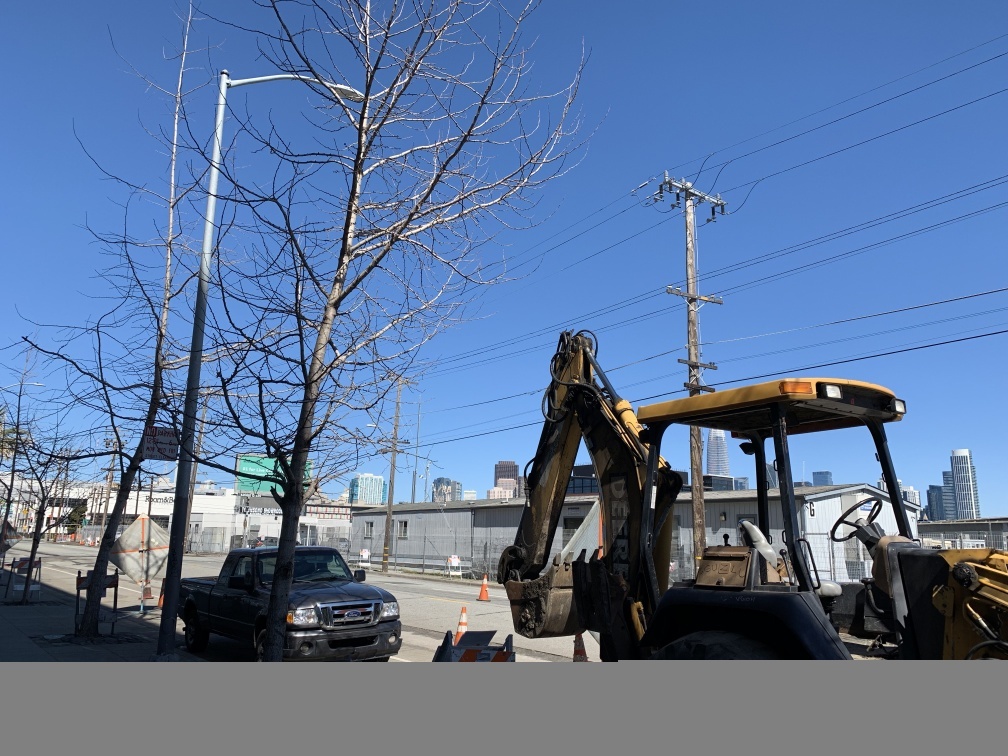

Supplement: Supplementary file 2 [file Kim_Layered_Depth_Refinement_CVPR_2022_supplemental.zip › comparisons/rgb/MoreSky02.jpg]

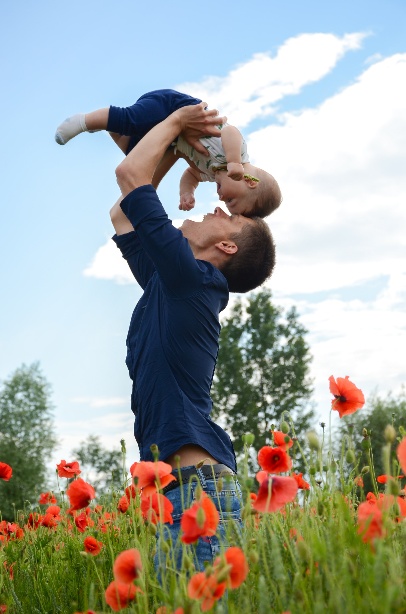

Supplement: Supplementary file 2 [file Kim_Layered_Depth_Refinement_CVPR_2022_supplemental.zip › comparisons/rgb/natasha-ivanchikhina-eU3e-hO0jkU-unsplash.jpg]

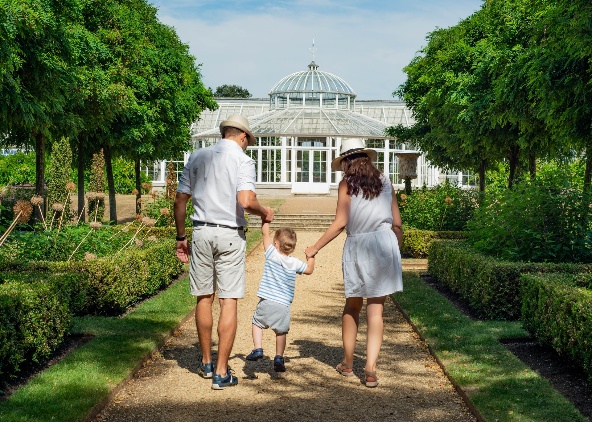

Supplement: Supplementary file 2 [file Kim_Layered_Depth_Refinement_CVPR_2022_supplemental.zip › comparisons/rgb/nikola-saliba-BonFa3wUrnU-unsplash.jpg]

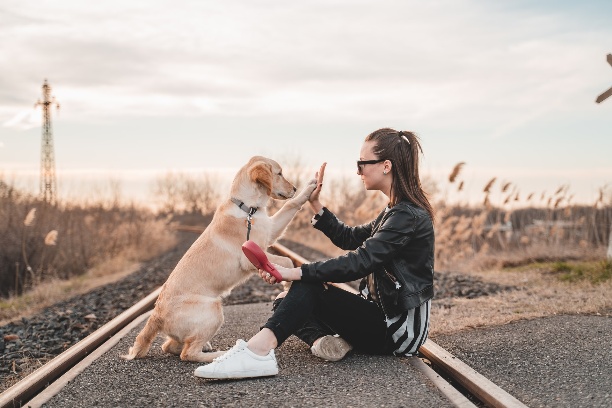

Supplement: Supplementary file 2 [file Kim_Layered_Depth_Refinement_CVPR_2022_supplemental.zip › comparisons/rgb/richard-brutyo-xvYxGcwFvuE-unsplash.jpg]

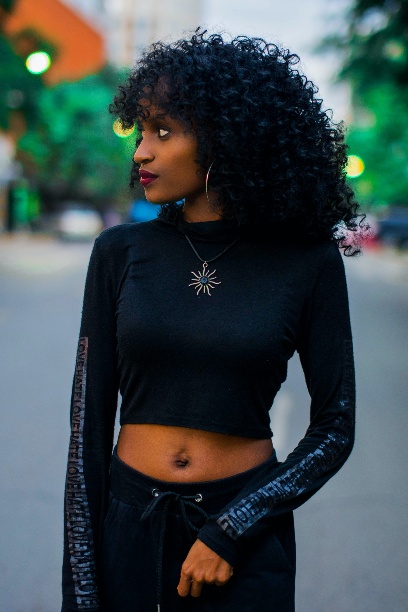

Supplement: Supplementary file 2 [file Kim_Layered_Depth_Refinement_CVPR_2022_supplemental.zip › comparisons/rgb/terricks-noah-OyhmfCc0pw4-unsplash.jpg]

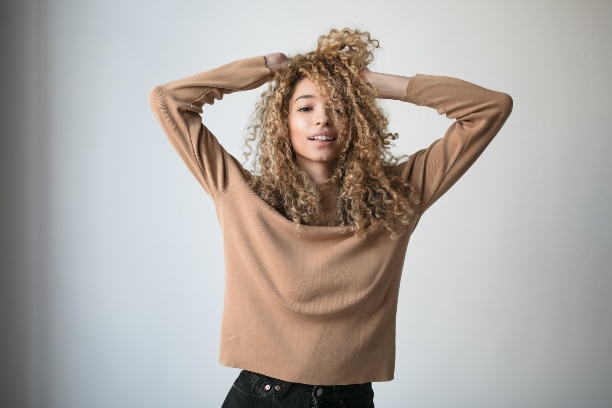

Supplement: Supplementary file 2 [file Kim_Layered_Depth_Refinement_CVPR_2022_supplemental.zip › comparisons/rgb/thought-catalog-mPE2I7afQiw-unsplash.jpg]

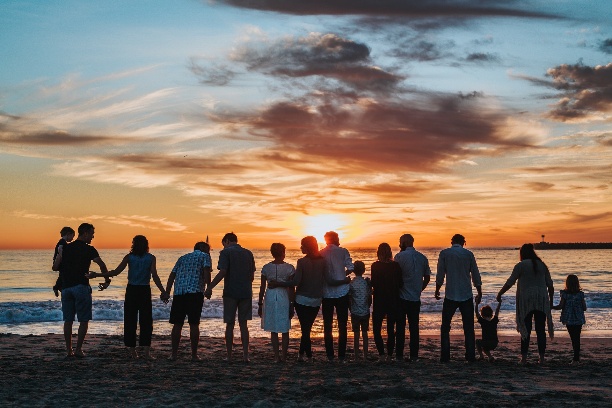

Supplement: Supplementary file 2 [file Kim_Layered_Depth_Refinement_CVPR_2022_supplemental.zip › comparisons/rgb/tyler-nix-V3dHmb1MOXM-unsplash.jpg]

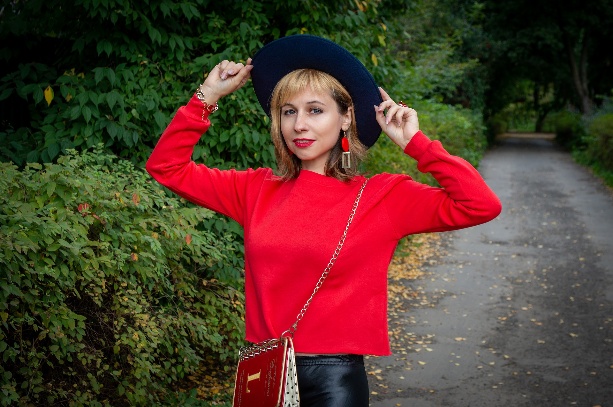

Supplement: Supplementary file 2 [file Kim_Layered_Depth_Refinement_CVPR_2022_supplemental.zip › comparisons/rgb/woman-g1a2e19219_1920-pixabay.jpg]

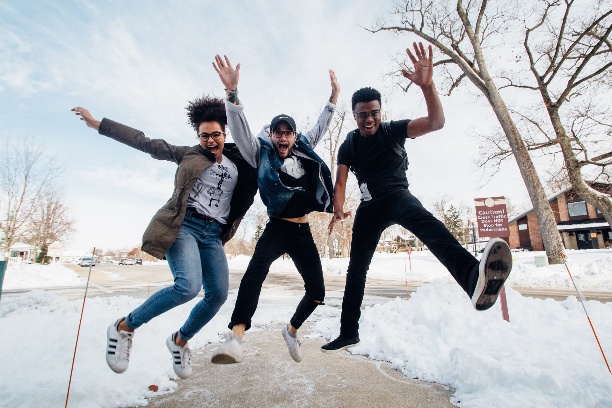

Supplement: Supplementary file 2 [file Kim_Layered_Depth_Refinement_CVPR_2022_supplemental.zip › comparisons/rgb/zachary-nelson-98Elr-LIvD8-unsplash.jpg]
